# Supplementary material for: A Lineage of Begomoviruses Encode Rep and AC4 Proteins of Enigmatic Ancestry: Hints on the Evolution of Geminiviruses in the New World
Source: Viruses. 2019 Jul 13;11(7):644. doi: 10.3390/v11070644 (PMC6669703; doi:10.3390/v11070644)
Supplement: Supplementary file 1 [file viruses-11-00644-s001.zip]

Archive with 9 entries (9 files):
- Suppl. Table S1- Torres-Herrera et al..pdf
- Suppl. Table S2- Torres Herrera et al..pdf
- Suppl. Table S3- Torres-Herrera et al..pdf
- Supplementary Fig. 1 Torres Herrera et al..pdf
- Supplementary Figure S2  Torres-Herrera et al.pdf
- Supplementary Figure S3- Torres-Herrera et al. 2019.pdf
- Supplementary Figure S4- Torres-Herrera et al..pdf
- Supplementary Figure S5- Torres-Herrera et al.pdf
- Supplementary Figure S6-Torres-Herrera et al..pdf
