# Supplementary material for: A Lineage of Begomoviruses Encode Rep and AC4 Proteins of Enigmatic Ancestry: Hints on the Evolution of Geminiviruses in the New World
Source: Viruses. 2019 Jul 13;11(7):644. doi: 10.3390/v11070644 (PMC6669703; doi:10.3390/v11070644)
Supplement: Supplementary file 1 [file viruses-11-00644-s001.zip › Suppl. Table S1- Torres-Herrera et al..pdf]

# A lineage of begomoviruses encode Rep and AC4 proteins of enigmatic ancestry: hints on the evolution of geminiviruses in the New World.

Iliana Torres-Herrera<sup>1\*</sup>, Angélica Romero-Osorio<sup>1\*</sup>, Oscar Moreno-Valenzuela<sup>2</sup>, Guillermo Pastor Palacios<sup>3</sup>, Yair Cardenas-Conejo<sup>4</sup>, Jorge H. Ramírez-Prado<sup>2</sup>, Lina Riego-Ruiz<sup>1</sup>, Salvador Ambriz-Granados<sup>1</sup>, Gerardo R. Argüello-Astorga<sup>1&</sup>.

## Supplementary Table 1. Oligonucleotides used in this work.

Table S1

| Oligonucleotide   | Sequence 5'- 3'                                |
|-------------------|------------------------------------------------|
| CP-YMAC-Rev       | TTWGASGCATGNGTACATGCCA                         |
| CP-EGP70-For      | GGTTGTGAAGGNCCNTGTAAGGTYCA                     |
| Rep-SL2150-For    | GACGGCRTTGGYGTCTTTGGCWGC                       |
| Rep-SL2370-Rev    | CTGYCRTGGTCAGTCGTCAAACC                        |
| BC1- 290-For      | GAGAARTAGTGGAGATCTATGTTTCAYCT                  |
| BVI-310-Rev       | CAATYTTRACNGTACCYTTRAAACG                      |
| BV1-310 For       | TTYAAGGGTACCGTTAAGATTG                         |
| BC1-290 Rev       | CCSATMAGRTGYAACATAGATCTCC                      |
| BC1-DLH- For      | GGAAGCTGARAARTAGTGGAGATCTATG                   |
| BC1- PWK-For      | TCGCAAACCTCKGTAATAGAGTTTCCATGG                 |
| BV1-GATP- Rev     | TTRGGGGTAGMACCGTCMATGTTTCATATC                 |
| BV1- MSKA-Rev     | CGCCTTCGACATMGTRTCWGACATCCAAC                  |
| JacA-Bam HI-For   | ACT <b>GGATCC</b> CCTGCCTTAATGATTGC            |
| JacA- Bam HI Rev  | TTA <b>GGATCC</b> AGTAAGATGGATAACC             |
| JacB–Hind I–For   | TAT <b>AAGCTT</b> TCTCTCCCATCTCCCGT            |
| JacB– Hind I Rev  | AGA <b>AAGCTT</b> ATCAGATGCGCATCCATG           |
| CapA-Bst XI-For   | TAC <b>CCA</b> TCGTGT <b>TGG</b> TAAGCGTTTCTGC |
| CapA- Bst XI- Rev | TTA <b>CCA</b> ACACGAT <b>TGG</b> TAATGCCATTGC |
| CapB Sal I-For    | ACT <b>GTCGA</b> CAGCTTTAACTTTCTTTG            |
| CapB-Sal I-Rev    | TCT <b>GTCGAC</b> AGCTAAGCACTCTGTAG            |
| VignaA-BamHI-For  | AT <b>GGATCC</b> TCTATCCTGTATATC               |
| VignaA BamHI-Rev  | AGA <b>GGATCC</b> AATATACACAAGGA               |
| VignaB-KpnI-For   | TAG <b>GGTACC</b> GTCAAGATTGAGCGTGAC           |
| VignaB-KpnI-Rev   | TT <b>GGTACC</b> CTTGAAACGGAGTCG               |
