# Supplementary material for: A Lineage of Begomoviruses Encode Rep and AC4 Proteins of Enigmatic Ancestry: Hints on the Evolution of Geminiviruses in the New World
Source: Viruses. 2019 Jul 13;11(7):644. doi: 10.3390/v11070644 (PMC6669703; doi:10.3390/v11070644)
Supplement: Supplementary file 1 [file viruses-11-00644-s001.zip › Suppl. Table S2- Torres Herrera et al..pdf]

# **A lineage of begomoviruses encode Rep and AC4 proteins of enigmatic ancestry: hints on the evolution of geminiviruses in the New World.**

Iliana Torres-Herrera<sup>1,5\*</sup>, Angélica Romero-Osorio<sup>1\*</sup>, Oscar Moreno-Valenzuela<sup>2</sup>, Guillermo Pastor Palacios<sup>3</sup>, Yair Cardenas-Conejo<sup>4</sup>, Jorge H. Ramírez-Prado<sup>2</sup>, Lina Riego-Ruiz<sup>1</sup>, Yereni Minero-García<sup>2</sup>, Salvador Ambriz-Granados<sup>1</sup>, Gerardo R. Argüello-Astorga<sup>1&</sup>.

<sup>1</sup> División de Biología Molecular, Instituto Potosino de Investigación Científica y Tecnológica, A.C., San Luis Potosí, SLP, México.

<sup>2</sup> Centro de Investigación Científica de Yucatán, A.C., Mérida, Yucatán, México

<sup>3</sup> CONACYT–CIIDZA–Instituto Potosino de Investigación Científica y Tecnológica A.C., San Luis Potosí, SLP, México,

<sup>4</sup> CONACyT-Universidad de Colima, Colima, México.

<sup>5</sup> Facultad de Ciencias Forestales, Universidad Juárez del Estado de Durango, México.

**Supplementary Table S2.** Names, acronyms and GenBank accession numbers of geminiviruses and endogenous viral *sequences (EVS)* included in the alignments of Rep motif III region and the N-terminal end of AC4 proteins (Figure 6)

**Table S2 – Geminiviruses and endogenous viral sequences harboring a characteristic consensus in the Rep domain adjacent to Motif III**

| <b>SLCV clade begomoviruses</b><br><b>QYKVS<del>GG</del>TKANKDDVYHN</b> |          |                   |
|-------------------------------------------------------------------------|----------|-------------------|
| <i>Virus</i>                                                            | Acronym  | GenBank Accession |
| <i>Abutilon golden mosaic Yucatan virus</i>                             | AbGMVYV  | KC430935          |
| <i>Capraria yellow spot Yucatan virus</i>                               | CarYSYV  | KC426927          |
| <i>Jacquemontia mosaic Yucatan virus</i>                                | JacMYuV  | JQ821386          |
| <i>Vigna yellow mosaic virus</i>                                        | ViYMV    | KC430936          |
| <i>Squash leaf curl virus</i>                                           | SLCV     | M38183            |
| <i>Cabbage leaf curl virus</i>                                          | CbLCV    | U65529            |
| <i>Rhynchosia golden mosaic Yucatán virus</i>                           | RhGMYuV  | EU021216          |
| <i>Tomato severe leaf curl virus</i>                                    | ToSLCV   | JN680352          |
| <i>Jacquemontia yellow vein virus</i>                                   | JacYVV   | KY624376          |
| <i>Tomato rugose yellow leaf curl virus</i>                             | TRYLCV   | JN381819          |
| <i>Tomato common mosaic virus</i>                                       | ToCmMV   | EU710754          |
| <b>Curtoviruses-type II</b><br><b>QYKVS<del>GG</del>TKANKDDVYHN</b>     |          |                   |
| <i>Spinach severe surly top virus</i>                                   | SpSCTV   | GU734126          |
| <i>Horseradish curly top virus</i>                                      | HrCTV    | U49907            |
| <b>Old and New World Begomoviruses</b><br><b>FQIDGRSARGGQQTAND</b>      |          |                   |
| <i>Abutilon Brazil virus</i>                                            | AbBV     | FN434438          |
| <i>Pepper huasteco yellow vein</i>                                      | PHYVV    | NC_001359         |
| <i>Jacquemontia yellow mosaic virus</i>                                 | JacYMV   | KF661331          |
| <i>Bean golden yellow mosaic virus</i>                                  | BGYMV    | NC_038791         |
| <i>African cassava mosaic virus</i>                                     | ACMV     | X17095            |
| <i>Watermelon chlorotic stunt virus</i>                                 | WmCSV    | NC_003708         |
| <i>Indian cassava mosaic virus</i>                                      | ICMV     | Z24758            |
| <i>Sweet potato leaf curl virus</i>                                     | SwLCV    | MK931322          |
| <b>Curtoviruses type-I</b><br><b>FQIDGRSARGGQQTAND</b>                  |          |                   |
| <i>Beet curly top virus - California [Logan]</i>                        | BCTV-Cal | NC_001412         |
| <i>Beet curly top virus- Mx</i>                                         | BCTV-MX  | EU586261          |
| <b>Turncurtoviruses</b><br><b>FQIDGRSARGGQQTAND</b>                     |          |                   |
| <i>Turnip curly top virus</i>                                           | TCTV     | KX533468          |
| <i>Turnip leaf roll virus</i>                                           | TLRoV,   | KT388088          |
| <i>Sesame curly top virus</i>                                           | SesCTV   | MH595454          |
| <b>Topocovirus</b><br><b>FQIDGRSARGGQQTAND</b>                          |          |                   |
| <i>Tomato pseudo-curly top</i>                                          | TPCTV    | X84735            |

| <b>Geminiviruses unassigned to a genus</b><br><b>FQIDGRSARGGQQTAND</b> |               |              |
|------------------------------------------------------------------------|---------------|--------------|
| <i>Grapevine geminivirus</i>                                           | GraGV-A       | KX570610     |
| <i>Apple geminivirus</i>                                               | AGmV,         | KM386645     |
| <i>Juncus maritimus associated virus</i>                               | JmaV          | MG001958     |
| <b>Endogenous viral sequences (EVS)</b><br><b>FQIDGRSARGGQQTAND</b>    |               |              |
| <i>Dioscorea cirrhosa endogenous viral seq.</i>                        | EVS-Dioscorea | KJ629235     |
| <i>Nicotiana tomentosiformis geminivirus-like replication protein</i>  | EVS-Nicotiana | XM_009626235 |
| <i>Corchorus yellow vein virus-like DNA</i>                            | EVS-Corchorus | KX10121      |
