# Supplementary material for: A Lineage of Begomoviruses Encode Rep and AC4 Proteins of Enigmatic Ancestry: Hints on the Evolution of Geminiviruses in the New World
Source: Viruses. 2019 Jul 13;11(7):644. doi: 10.3390/v11070644 (PMC6669703; doi:10.3390/v11070644)
Supplement: Supplementary file 1 [file viruses-11-00644-s001.zip › Suppl. Table S3- Torres-Herrera et al..pdf]

# **A lineage of begomoviruses encode Rep and AC4 proteins of enigmatic ancestry: hints on the evolution of geminiviruses in the New World.**

Iliana Torres-Herrera<sup>1,5\*</sup>, Angélica Romero-Osorio<sup>1\*</sup>, Oscar Moreno-Valenzuela<sup>2</sup>, Guillermo Pastor Palacios<sup>3</sup>, Yair Cardenas-Conejo<sup>4</sup>, Jorge H. Ramírez-Prado<sup>2</sup>, Lina Riego-Ruiz<sup>1</sup>, Yereni Minero-García<sup>2</sup>, Salvador Ambriz-Granados<sup>1</sup>, Gerardo R. Argüello-Astorga<sup>1&</sup>.

<sup>1</sup> División de Biología Molecular, Instituto Potosino de Investigación Científica y Tecnológica, A.C., San Luis Potosí, SLP, México.

<sup>2</sup> Centro de Investigación Científica de Yucatán, A.C., Mérida, Yucatán, México

<sup>3</sup> CONACYT–CIIDZA–Instituto Potosino de Investigación Científica y Tecnológica A.C., San Luis Potosí, SLP, México,

<sup>4</sup> CONACyT-Universidad de Colima, Colima, México.

<sup>5</sup> Facultad de Ciencias Forestales, Universidad Juárez del Estado de Durango, México.

**Supplementary Table S3.** Names, acronyms and GenBank accession numbers of geminiviruses and endogenous viral *sequences (EVS)* included in the alignments of the N-terminal domain of AC4/C4 proteins (Figure 7).

**Table S3 – Geminivirus and endogenous virus sequence in the alignment of N-terminal domain of AC4 proteins.**

| <b>SLCV clade begomoviruses</b><br><b>MKLFKCFK</b>      |            |                   |
|---------------------------------------------------------|------------|-------------------|
| <i>Virus</i>                                            | Acronym    | GenBank Accession |
| <i>Abutilon golden mosaic Yucatan virus</i>             | AbGMV      | KC430935          |
| <i>Cabbage leaf curl virus</i>                          | CbLCuV     | MH248136          |
| <i>Bean calico mosaic virus</i>                         | BCaMV      | AF110189          |
| <i>Tomato common mosaic virus</i>                       | ToCoMV     | NC_010835         |
| <i>Sida yellow leaf curl virus</i>                      | SiYLCV     | EU710750          |
| <i>Tomato rugose yellow leaf curl virus</i>             | ToRYLCV    | JN381815          |
| <b>Curtoviruses-type II</b><br><b>MKLFKCFK</b>          |            |                   |
| <i>Horseradish curly top virus</i>                      | HrCTV      | U49907            |
| <i>Spinach severe curly top virus</i>                   | SpSCTV     | GU734126          |
| <b>Old and New World Begomoviruses</b><br><b>MGNLIS</b> |            |                   |
| <i>Tomato golden mosaic virus</i>                       | TGMV       | NC_001507         |
| <i>Rhynchosia golden mosaic virus</i>                   | RhGMV      | NC_010294         |
| <i>Tomato yellow leaf curl Vietnam virus</i>            | TYLCVV     | EU189150          |
| <i>Mimosa yellow leaf curl virus</i>                    | MiLCV      | DQ641695          |
| <i>East African cassava mosaic Zanzibar virus</i>       | EACMZV     | MK059410          |
| <i>Cassava mosaic Madagascar virus</i>                  | CMMdV      | HE617299          |
| <b>Curtoviruses- I</b><br><b>MGNLIS</b>                 |            |                   |
| <i>Beet curly top virus - California [Logan]</i>        | BCTV-Cal   | NC_001412         |
| <i>Beet curly top virus-Idaho</i>                       | BCTV-Idaho | KX867057          |
| <b>Topocuviruses</b><br><b>MGNLIS</b>                   |            |                   |
| <i>Tomato pseudo-curly top</i>                          | TPCTV      | X84735            |
| <b>Unclassified geminiviruses</b><br><b>MGNLIS</b>      |            |                   |
| <i>Grapevine geminivirus A</i>                          | GraGV-A    | KX618694          |
| <i>Apple geminivirus</i>                                | AGmV       | KM386645          |
| <i>Juncus maritimus- associated virus</i>               | JmaV       | MG001958          |
| <i>Polygala garcinii-associated virus</i>               | PgaV       | MG001959          |

| Endogenous viral sequences                                              |                                       |              |
|-------------------------------------------------------------------------|---------------------------------------|--------------|
| <i>Lactuca sativa</i> cultivar <i>Salinas</i> unplaced genomic scaffold | EVS- <i>Lactuca sativa</i>            | NW_019676544 |
| <i>Corchorus olitorius</i> cultivar <i>JRO-524</i>                      | EVS- <i>Corchorus olitorius</i>       | LLWS00000000 |
| <i>Nicotiana tomentosiformis</i> unplaced genomic scaffold              | EVS- <i>Nicotiana tomentosiformis</i> | NW_008941319 |
| <i>Dioscorea nummularia</i> endogenous virus EGV2                       | EVS- <i>Dioscorea nummularia</i>      | KJ629225     |
| <i>Coffea arabica</i> geminivirus-like replication protein              | EVS- <i>Coffea canephora</i>          | XM_027241759 |
