# Supplementary material for: A Lineage of Begomoviruses Encode Rep and AC4 Proteins of Enigmatic Ancestry: Hints on the Evolution of Geminiviruses in the New World
Source: Viruses. 2019 Jul 13;11(7):644. doi: 10.3390/v11070644 (PMC6669703; doi:10.3390/v11070644)
Supplement: Supplementary file 1 [file viruses-11-00644-s001.zip › Supplementary Fig. 1 Torres Herrera et al..pdf]

# **A lineage of begomoviruses encode Rep and AC4 proteins of enigmatic ancestry: hints on the evolution of geminiviruses in the New World.**

Ilina Torres-Herrera<sup>1\*</sup>, Angélica Romero-Osorio<sup>1\*</sup>, Oscar Moreno-Valenzuela<sup>2</sup>, Guillermo Pastor Palacios<sup>3</sup>, Yair Cardenas-Conejo<sup>4</sup>, Jorge H. Ramírez-Prado<sup>2</sup>, Lina Riego-Ruiz<sup>1</sup>, Yereni Minero-García<sup>2</sup>, Salvador Ambriz-Granados<sup>1</sup>, Gerardo R. Argüello-Astorga<sup>1&</sup>.

## **Supplementary Figure 1.**

**Weeds infected with the begomoviruses described in this study**

**A**

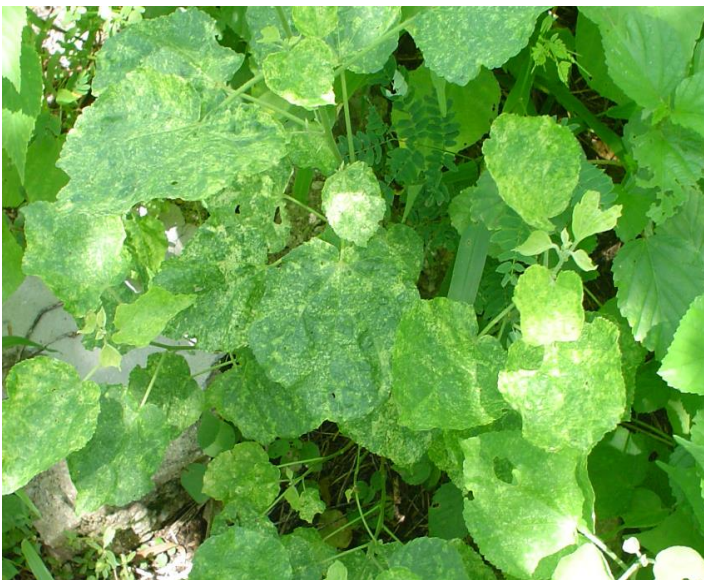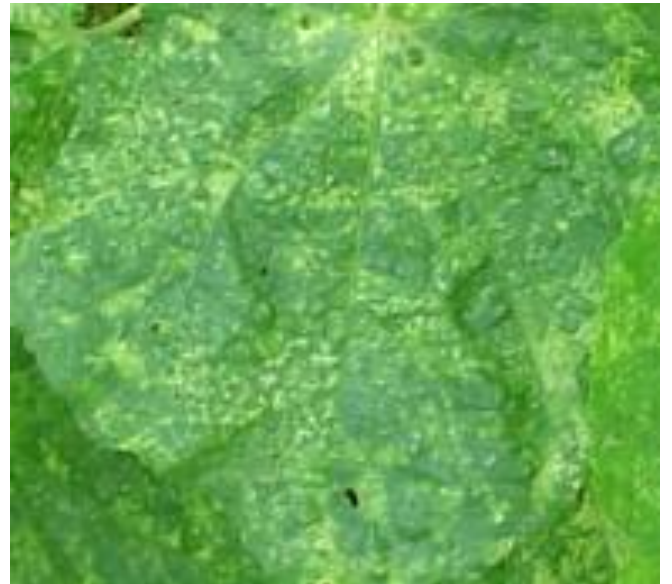

**S1A. *Abutilon permolle* plant co-infected with AbGMV and CoYSV.**

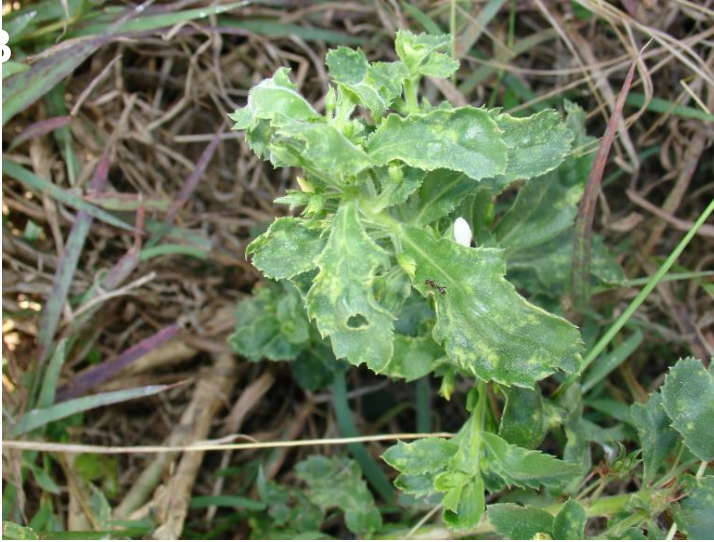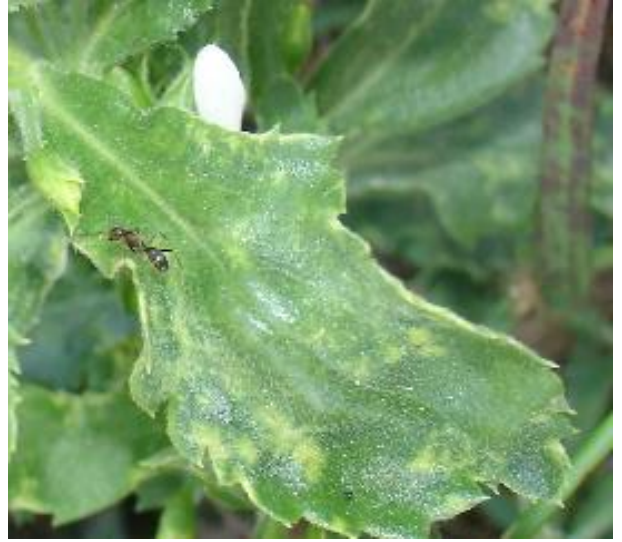

**S1B. *Capraria biflora* plant infected with CarYMYV**

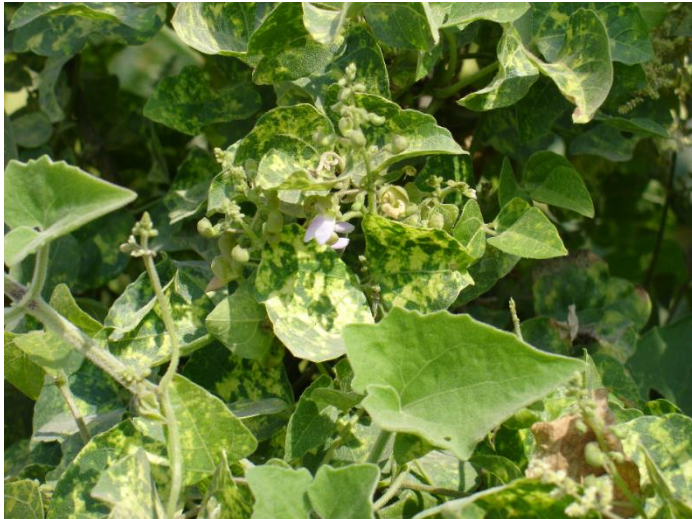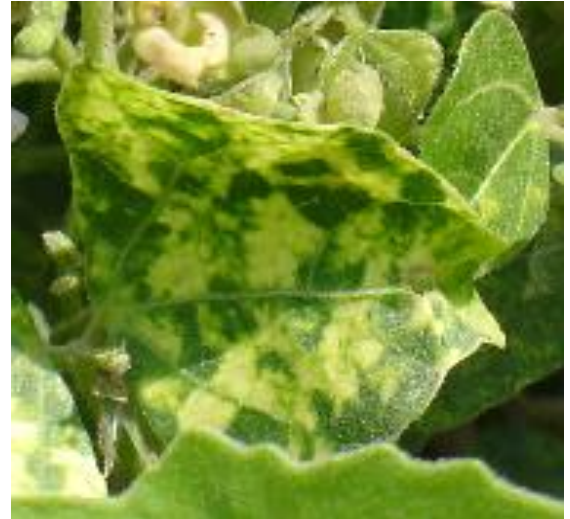

**S1C. *Vigna elegans* plant infected with ViYMV.**
