# Supplementary material for: A Lineage of Begomoviruses Encode Rep and AC4 Proteins of Enigmatic Ancestry: Hints on the Evolution of Geminiviruses in the New World
Source: Viruses. 2019 Jul 13;11(7):644. doi: 10.3390/v11070644 (PMC6669703; doi:10.3390/v11070644)
Supplement: Supplementary file 1 [file viruses-11-00644-s001.zip › Supplementary Figure S2 Torres-Herrera et al.pdf]

# **A lineage of begomoviruses encode Rep and AC4 proteins of enigmatic ancestry: hints on the evolution of geminiviruses in the New World.**

Iliana Torres-Herrera<sup>1,5\*</sup>, Angélica Romero-Osorio<sup>1\*</sup>, Oscar Moreno-Valenzuela<sup>2</sup>, Guillermo Pastor Palacios<sup>3</sup>, Yair Cardenas-Conejo<sup>4</sup>, Jorge H. Ramírez-Prado<sup>2</sup>, Lina Riego-Ruiz<sup>1</sup>, Yereni Minero-García<sup>2</sup>, Salvador Ambriz-Granados<sup>1</sup>, Gerardo R. Argüello-Astorga<sup>1&</sup>.

<sup>1</sup> División de Biología Molecular, Instituto Potosino de Investigación Científica y Tecnológica, A.C., San Luis Potosí, SLP, México.

<sup>2</sup> Centro de Investigación Científica de Yucatán, A.C., Mérida, Yucatán, México

<sup>3</sup> CONACYT–CIIDZA–Instituto Potosino de Investigación Científica y Tecnológica A.C., San Luis Potosí, SLP, México,

<sup>4</sup> CONACyT-Universidad de Colima, Colima, Mexico.

<sup>5</sup> Facultad de Ciencias Forestales, Universidad Juárez del Estado de Durango, Mexico.

## **Supplementary Figure S2**

**Phylogenetic tree and matrix of pairwise sequence identity based on DNA-A sequences of the isolated begomoviruses and their relatives.**

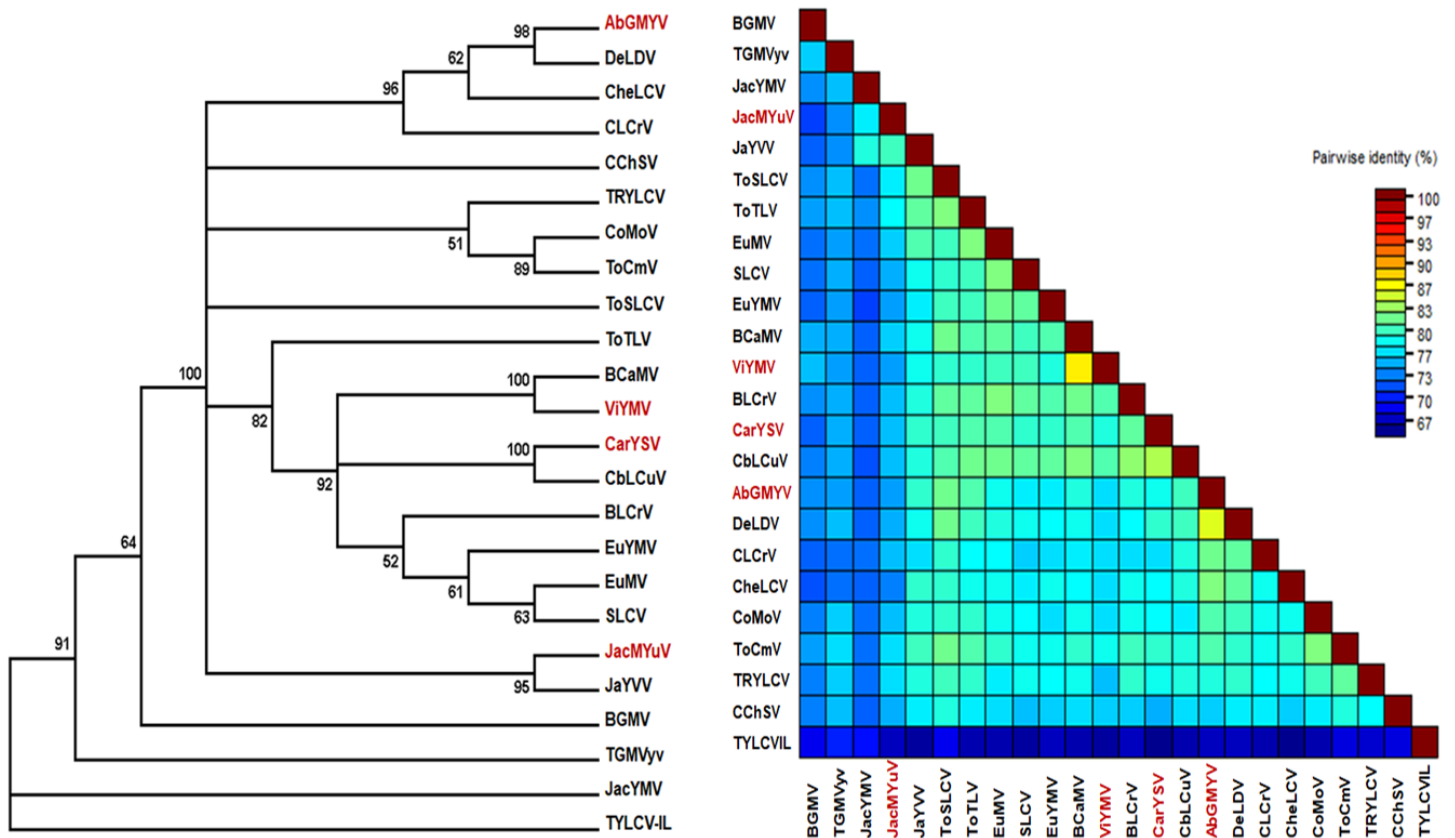

**Supplementary Figure 2.** Maximum likelihood phylogenetic tree and matrix of pairwise sequence identity based on full length sequences of genome components A. ML phylogenies were constructed by multiple alignments of complete DNA-A sequences. ML tree in MEGA 7 was based on the Tamura-Nei model and the tree support was tested by bootstrapping with 1000 replicates. SDTv software was used for the matrix of pairwise sequence identity.
